# Supplementary material
Source: publisher figshare collection journal article supplement (https://karger.figshare.com/ndownloader/files/20160515)
Supplement: Supplementary file 1 [file 20160515]

**Suppl. table 1. Visual analog scales (VAS) score for tinnitus symptoms before and after rTMS**.

| **VAS** | Pre-treatment | 1 wk. | 2 wk. | 4 wk. | 8 wk. |
| --- | --- | --- | --- | --- | --- |
| **Group 1** |  |  |  |  |  |
| Awareness | 7.5±2.5 | 5.8±3.0***** | 5.2±2.9***** | 6.2±3.1***** | 5.8±3.2***** |
| Annoyance | 6.1±2.3 | 4.8±2.4***** | 4.3±2.4***** | 4.3±2.0***** | 4.1±2.0***** |
| Loudness | 6.3±1.6 | 5.5±2.2 | 4.4±1.6***** | 4.7±2.0***** | 4.4±1.6***** |
| Effect on daily life | 4.8±1.9 | 3.9±2.1***** | 3.4±1.5***** | 3.2±2.2***** | 3.5±2.1 |
| **Group 2** |  |  |  |  |  |
| Awareness | 7.8±2.7 | 7.3±2.8 | 7.1±3.1 | 6.7±2.7***** | 6.8±2.2 |
| Annoyance | 6.5±2.6 | 6.7±1.9 | 5.8±2.0 | 5.6±2.1 | 5.8±1.9 |
| Loudness | 6.9±2.0 | 6.5±2.0 | 6.2±1.7 | 6.5±1.8 | 5.8±2.1 |
| Effect on daily life | 5.3±2.4 | 6.2±1.9 | 5.8±2.1 | 5.1±2.0 | 4.7±1.7 |

*Statistically significant improvement vs. pre-treatment VAS score (*p*<0.05); wk., weeks after treatment. Data are presented as means ± standard deviations.
